# Supplementary material for: Insight into the ordering process and ethanol oxidation performance of Au–Pt–Cu ternary alloys
Source: Royal Society of Chemistry journal article supplement (doi:10.1039/d4dt00553h), 2024-01-01
Supplement: d4dt00553h1.pdf [file d4dt00553h1.pdf]

*Supporting Information*

**Insight into the Ordering Process and Ethanol Oxidation**

**Performance of Au-Pt-Cu Ternary Alloys**

Wenbo Zhao,<sup>†</sup> Mengyao Li,<sup>†</sup> Shi Hu<sup>†\*</sup>

<sup>†</sup>Department of Chemistry, School of Science, Tianjin Key Laboratory of Molecular Optoelectronic Science, Tianjin University, Tianjin 300072, China.

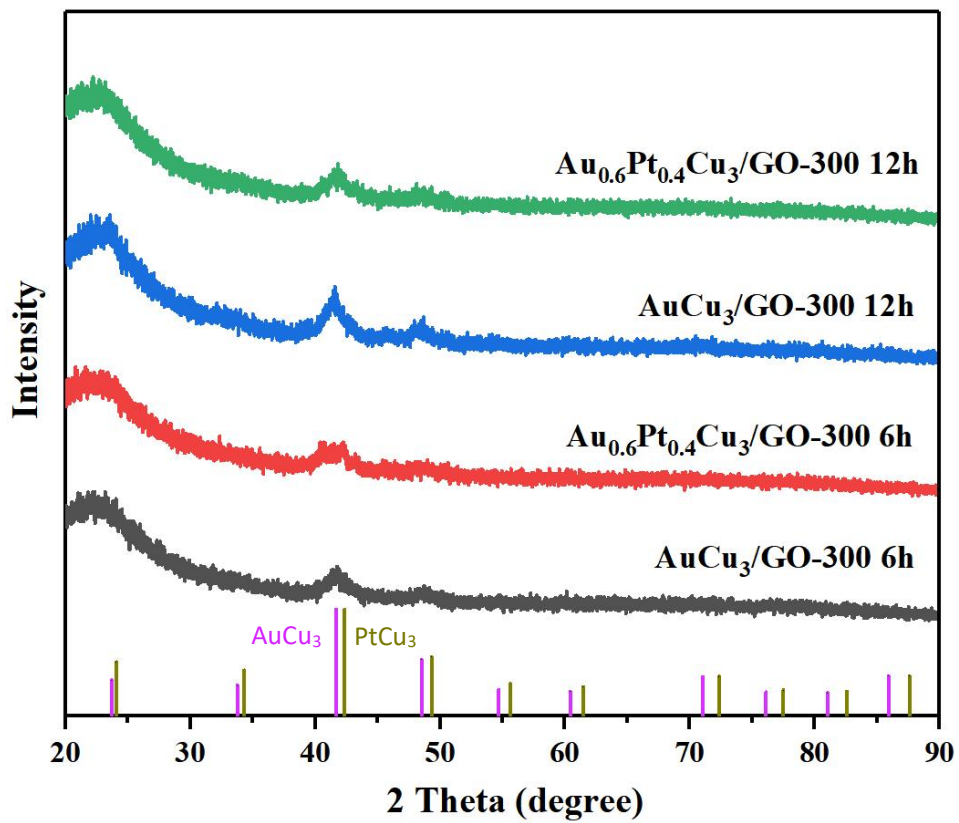

Fig. S1 The synthesis of  $\text{Au}_x\text{Pt}_{1-x}\text{Cu}_3/\text{rGO}$  under 300 degrees.

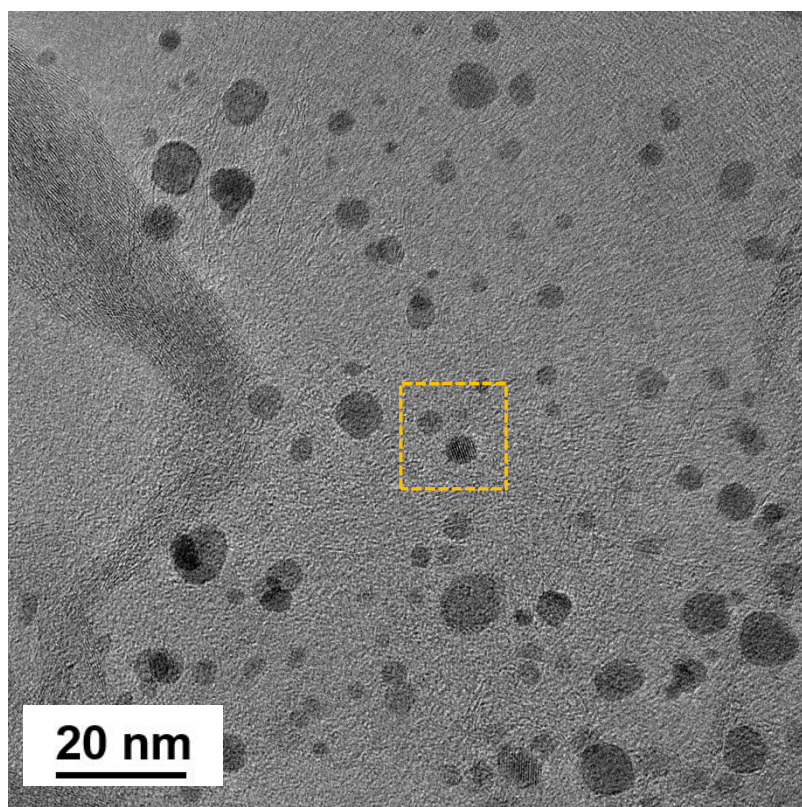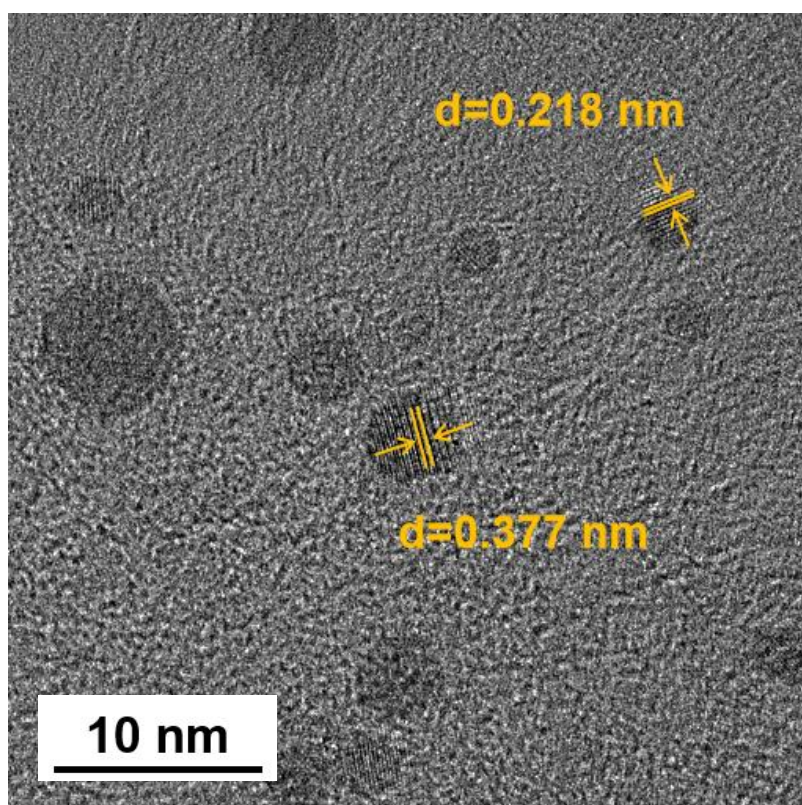

Fig. S2 High-resolution transmission electron microscopy images of  $\text{Au}_{0.2}\text{Pt}_{0.8}\text{Cu}_3/\text{rGO}$ .



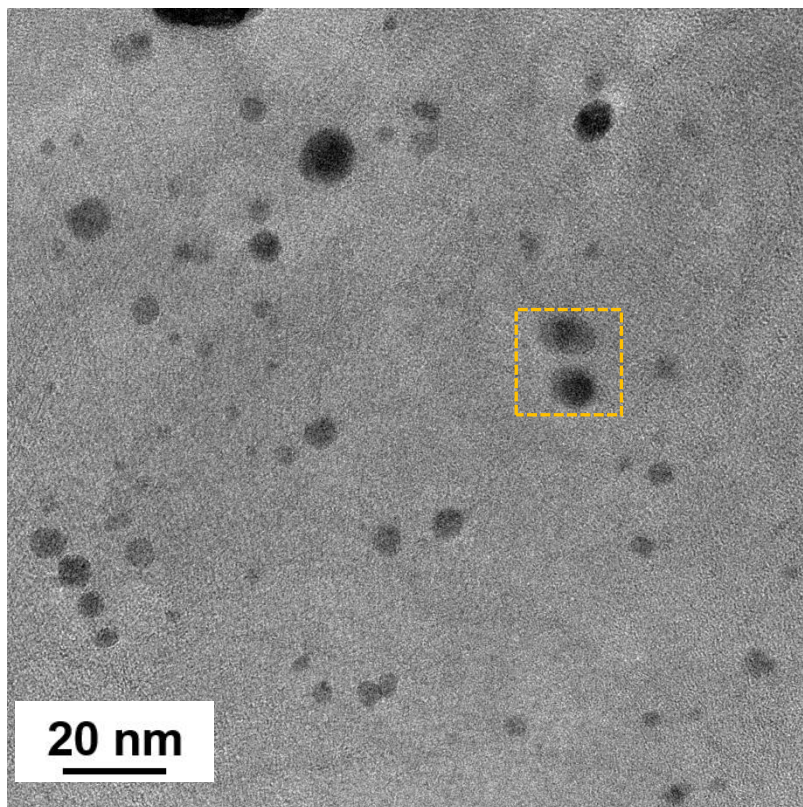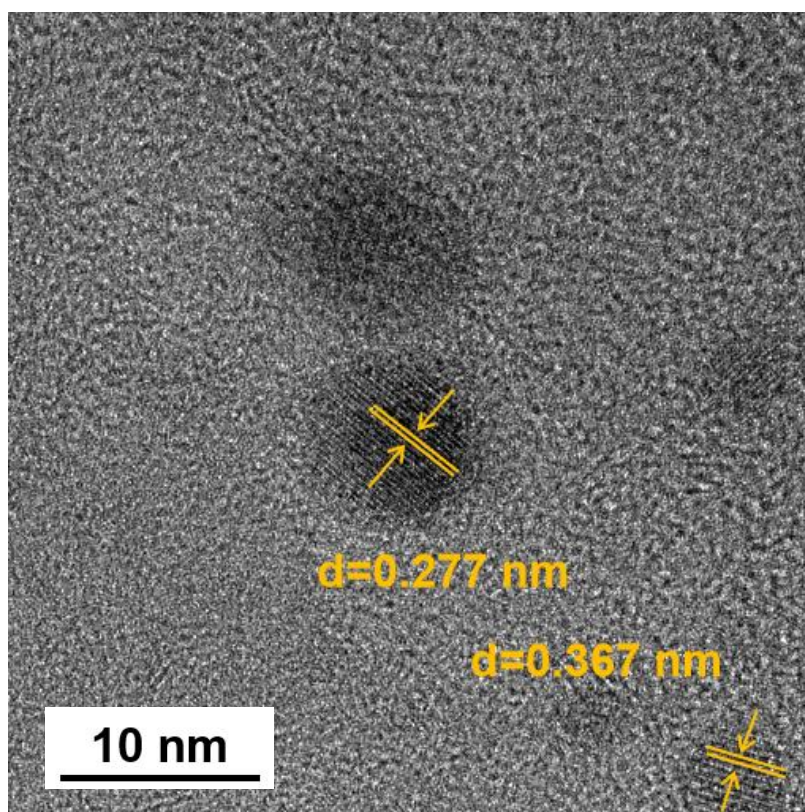

Fig. S3 High-resolution transmission electron microscopy images of  $\text{Au}_{0.6}\text{Pt}_{0.4}\text{Cu}_3/\text{rGO}$ .



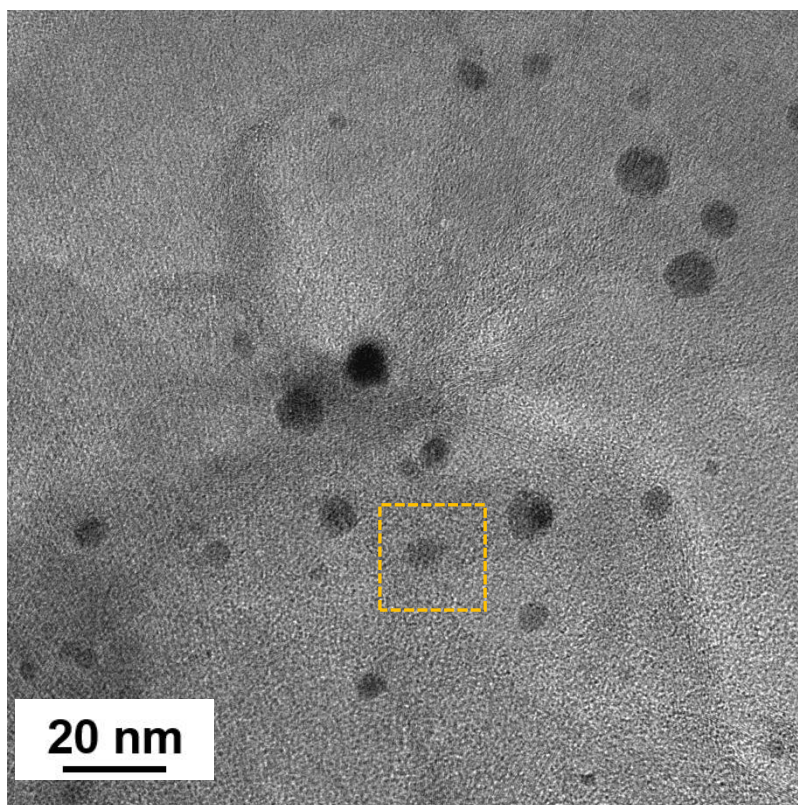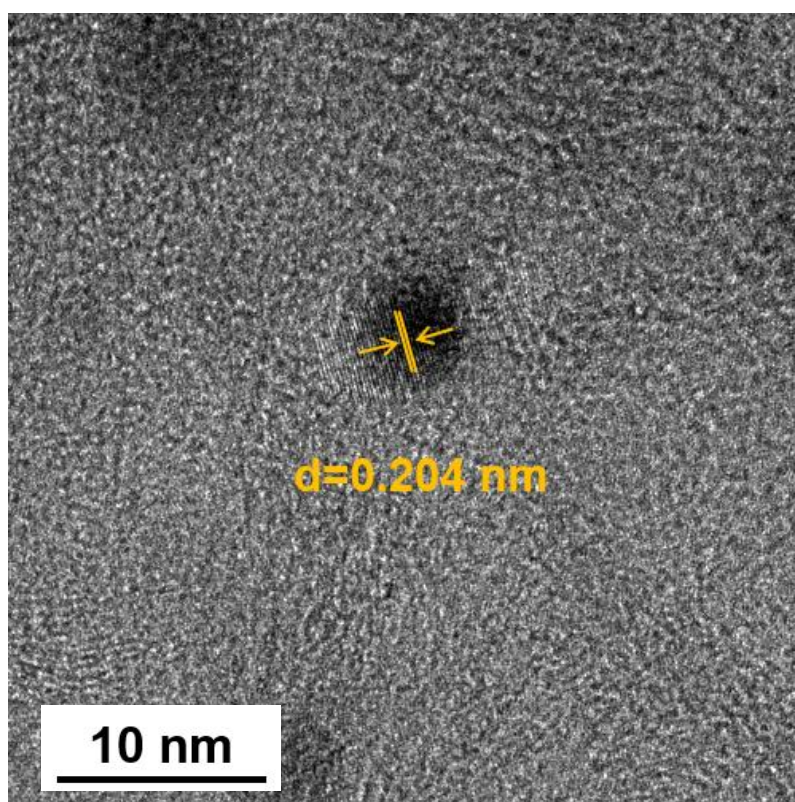

Fig. S4 High-resolution transmission electron microscopy images of  $\text{Au}_{0.8}\text{Pt}_{0.2}\text{Cu}_3/\text{rGO}$ .

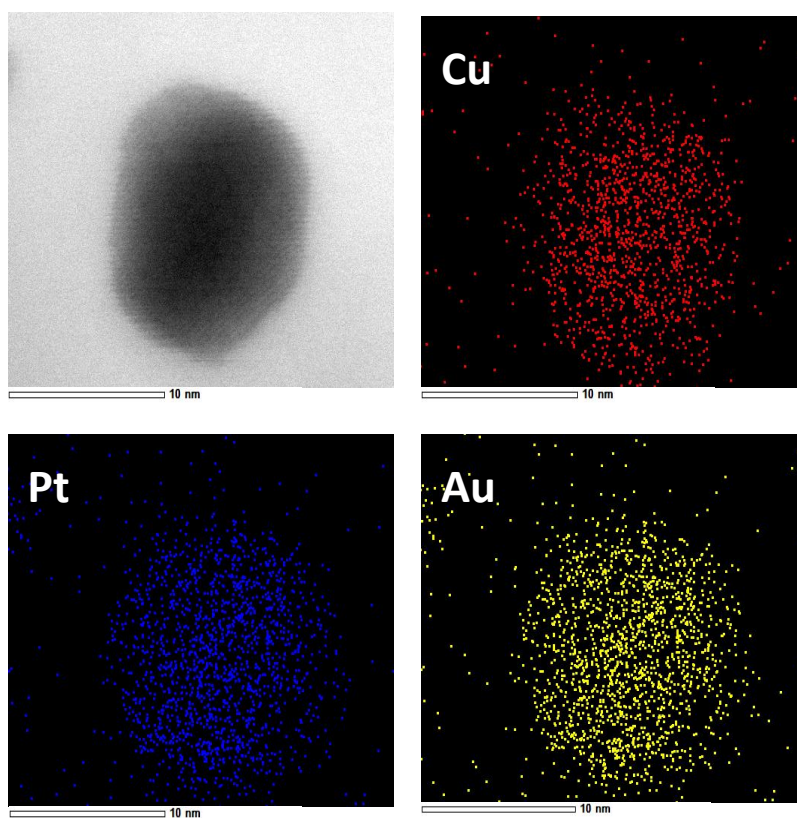

**Fig. S5** Energy Dispersive Spectroscopy (EDS) mapping of  $\text{Au}_{0.2}\text{Pt}_{0.8}\text{Cu}_3/\text{rGO}$ .

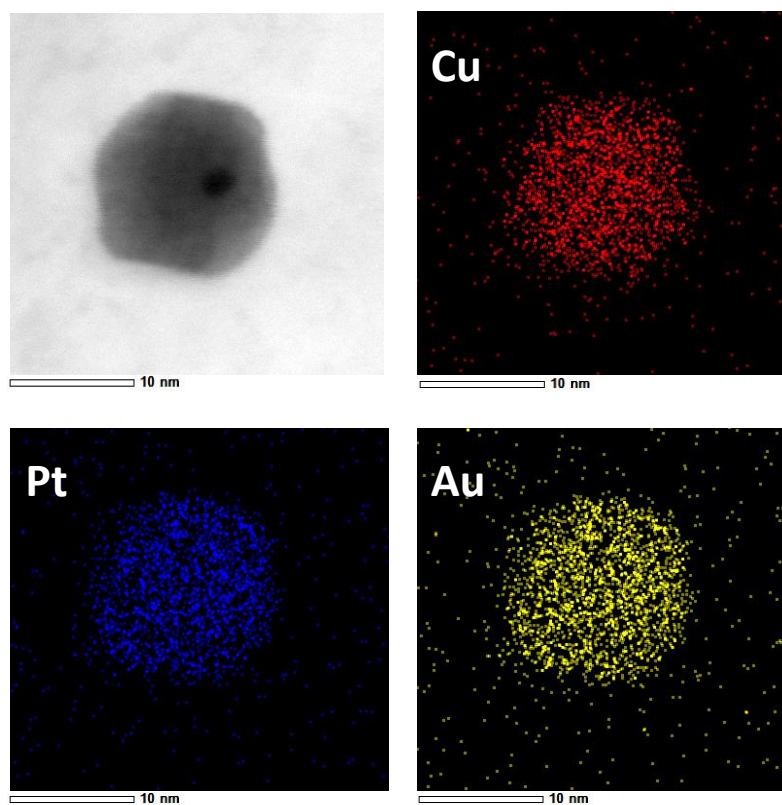

**Fig. S6** Energy Dispersive Spectroscopy (EDS) mapping of  $\text{Au}_{0.6}\text{Pt}_{0.4}\text{Cu}_3/\text{rGO}$ .

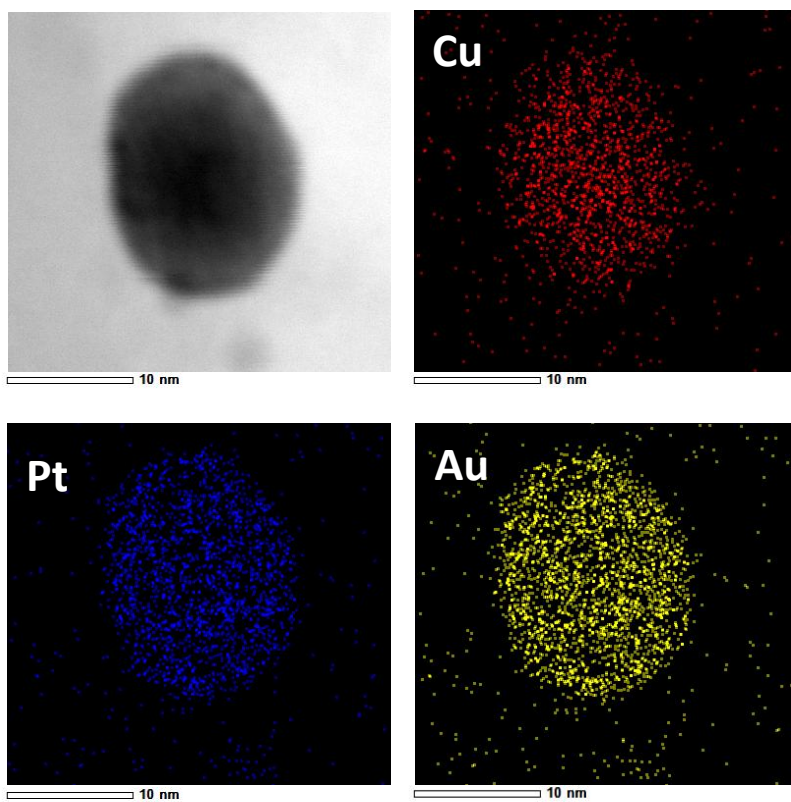

**Fig. S7** Energy Dispersive Spectroscopy (EDS) mapping of  $\text{Au}_{0.8}\text{Pt}_{0.2}\text{Cu}_3/\text{rGO}$ .



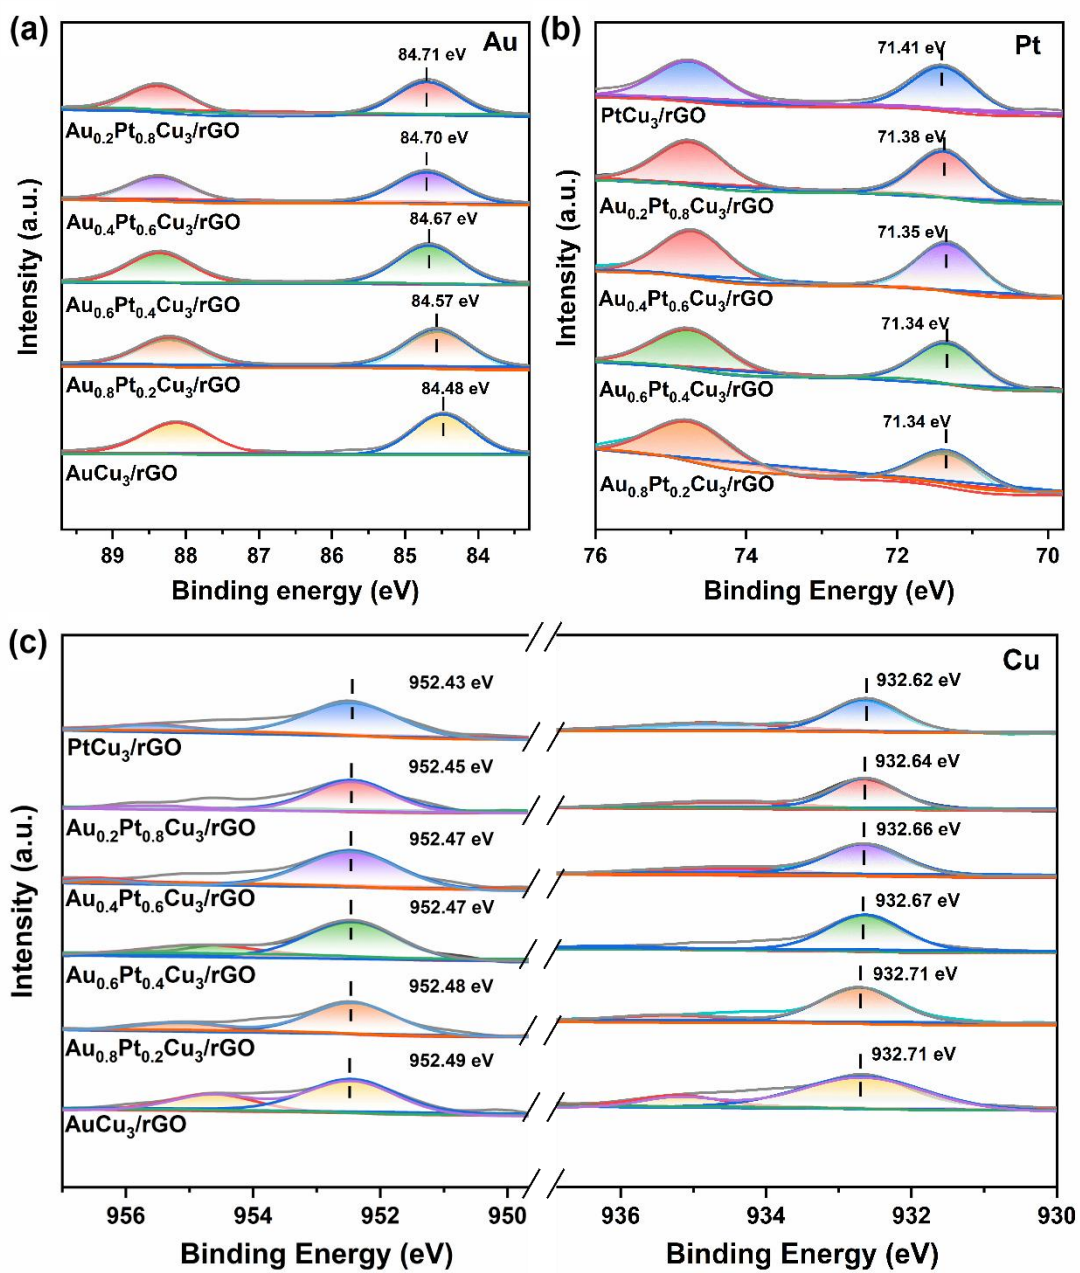

**Fig. S8** X-ray photoelectron spectroscopy patterns of (a) Au 4f, (b) Pt 4f, (c) Cu 2p<sub>1/2</sub> and Cu 2p<sub>3/2</sub> in Au<sub>x</sub>Pt<sub>1-x</sub>Cu<sub>3</sub>/rGO ordered alloys.

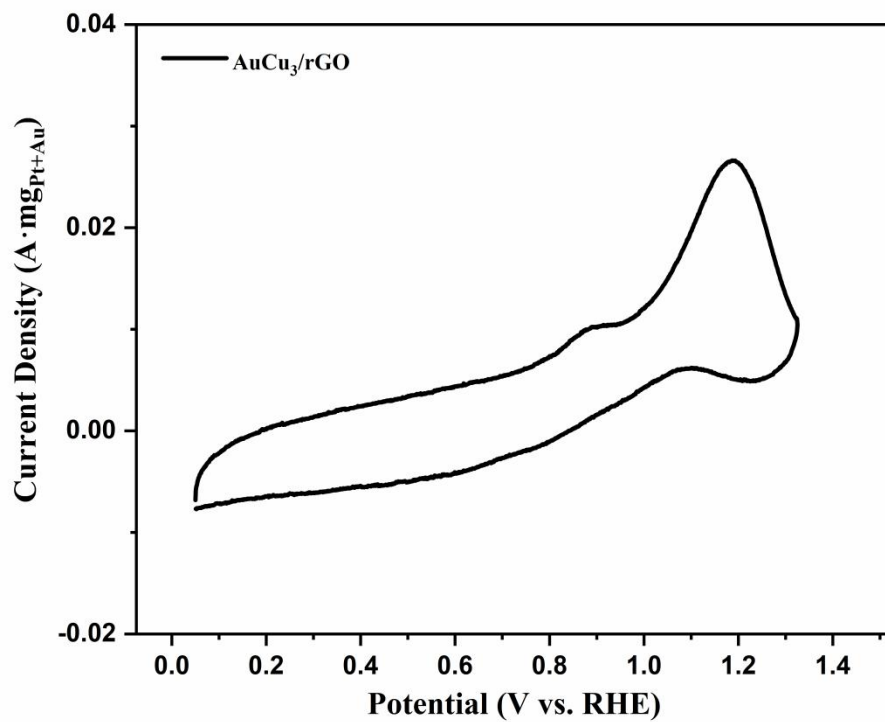

**Fig. S9** Ethanol oxidation reaction in 1.0 M KOH and 1.0M EtOH with AuCu<sub>3</sub>/rGO.

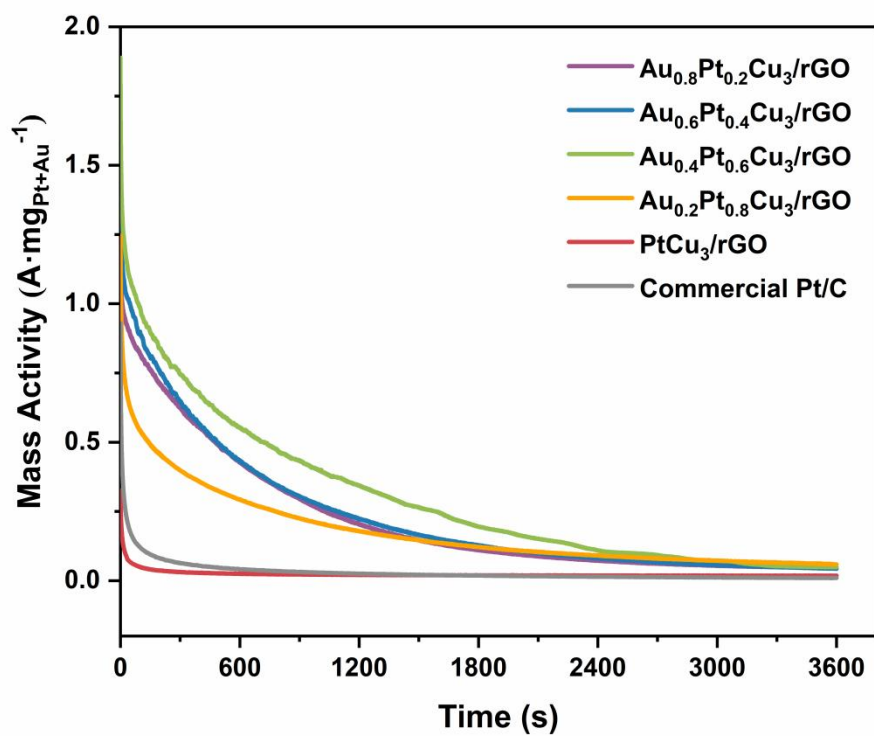

**Fig. S10** Chronoamperometry testing at 0.77 V<sub>RHE</sub> for 3600 seconds in N<sub>2</sub>-saturated 1.0 M KOH and 1.0 M EtOH mixture solution.



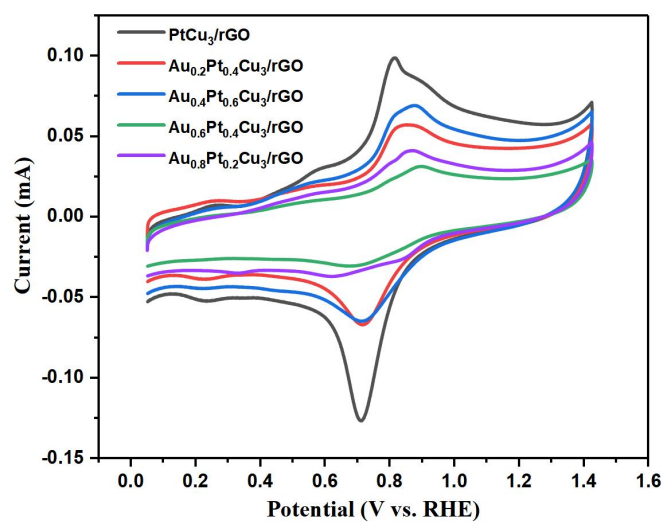

**Fig. S11** Cyclic Voltammetry of Au<sub>x</sub>Pt<sub>1-x</sub>Cu<sub>3</sub>/rGO in 1.0M KOH with a scan rate of 50 mV • s<sup>-1</sup>..

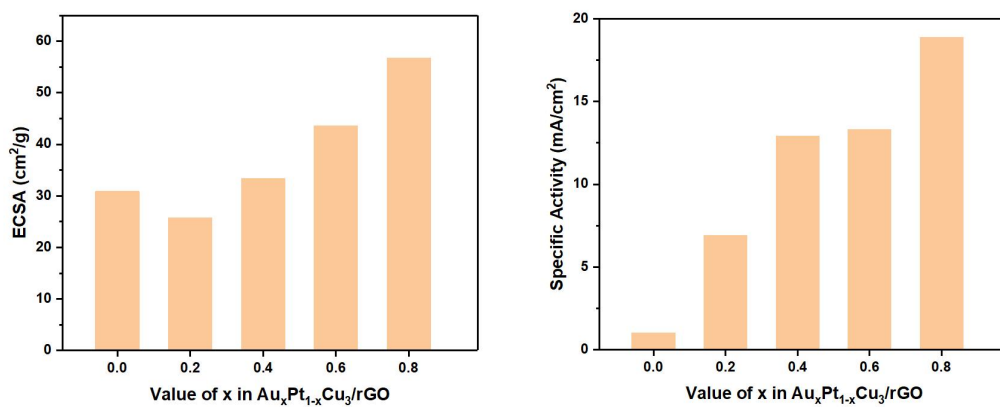

**Fig. S12** Electrochemical active surface area (ECSA) and specific activity of Au<sub>x</sub>Pt<sub>1-x</sub>Cu<sub>3</sub>/rGO in 1.0 M KOH and 1.0M EtOH. The ECSA is calculated with the area of the Pt oxide reduction peak.<sup>1-2</sup>

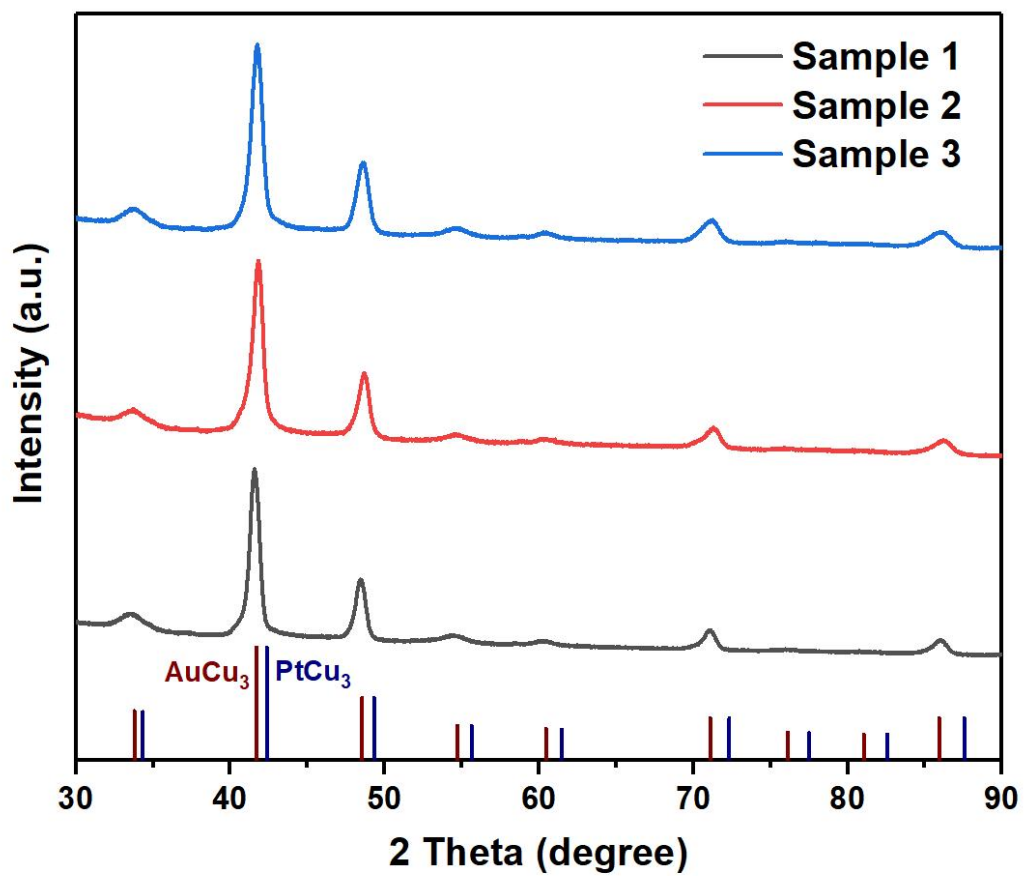

Fig. S13 XRD pattern of AuCu<sub>3</sub>/rGO parallel samples.



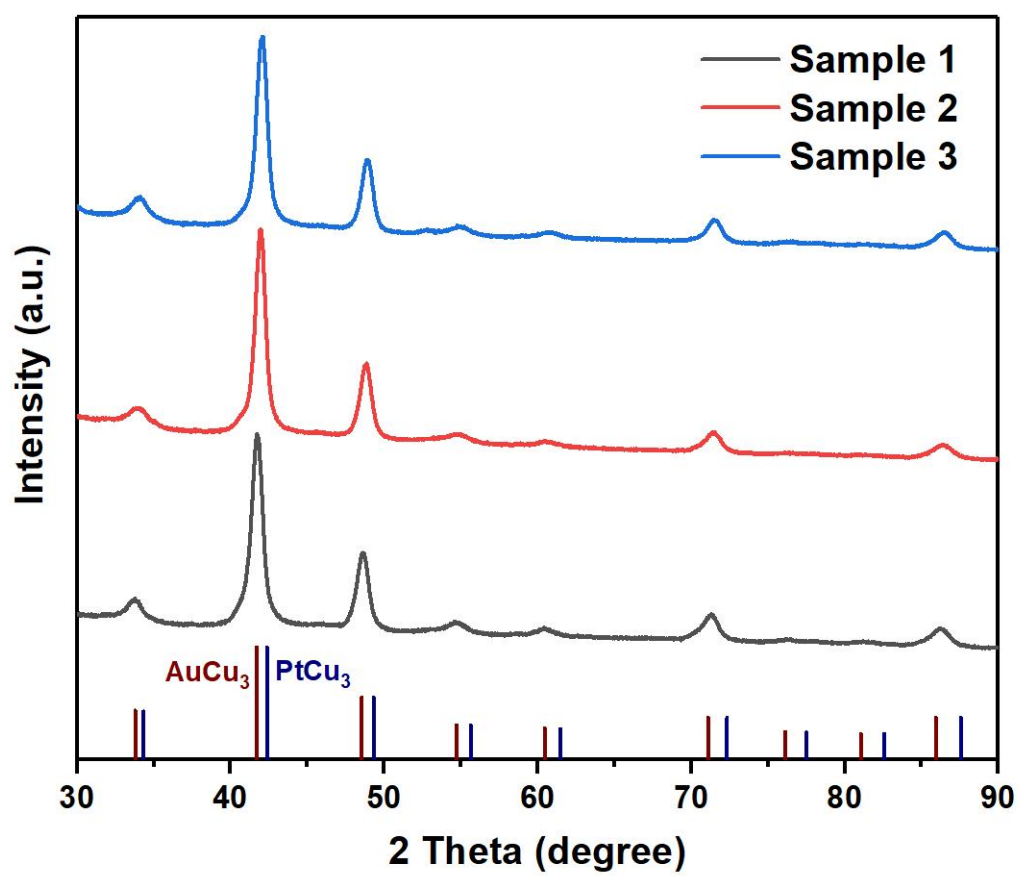

Fig. S14 XRD pattern of Au<sub>0.8</sub>Pt<sub>0.2</sub>Cu<sub>3</sub>/rGO parallel samples.

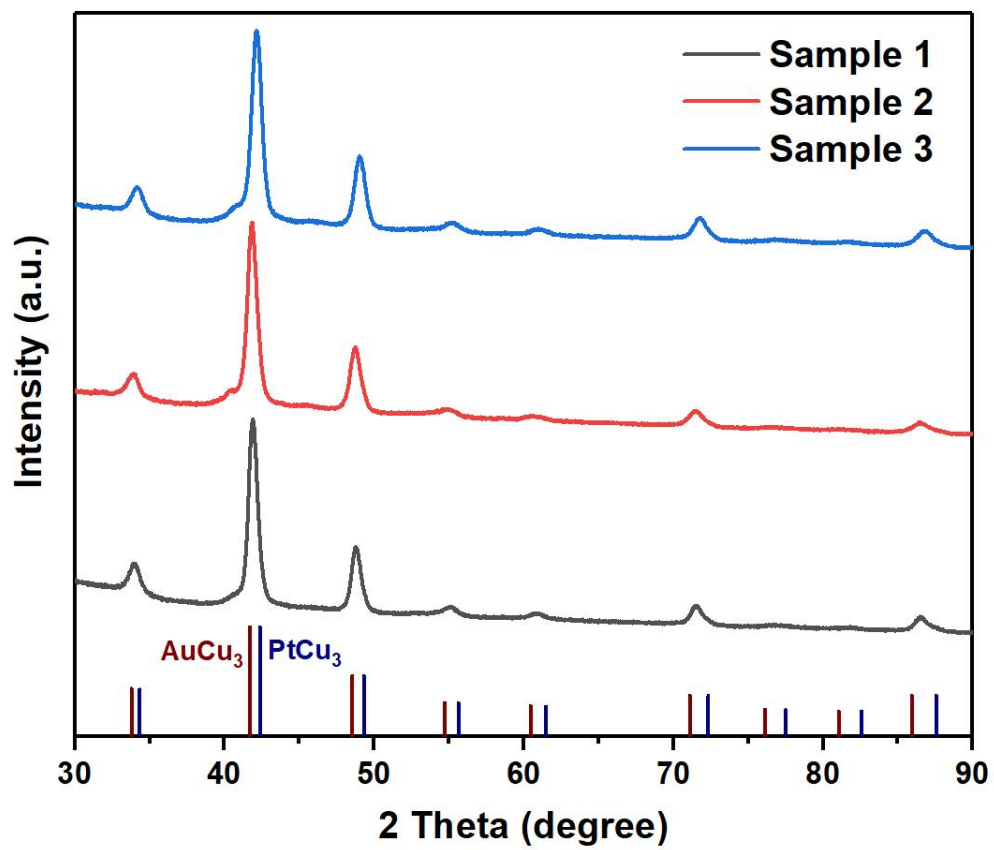

Fig. S15 XRD pattern of Au<sub>0.6</sub>Pt<sub>0.4</sub>Cu<sub>3</sub>/rGO parallel samples.

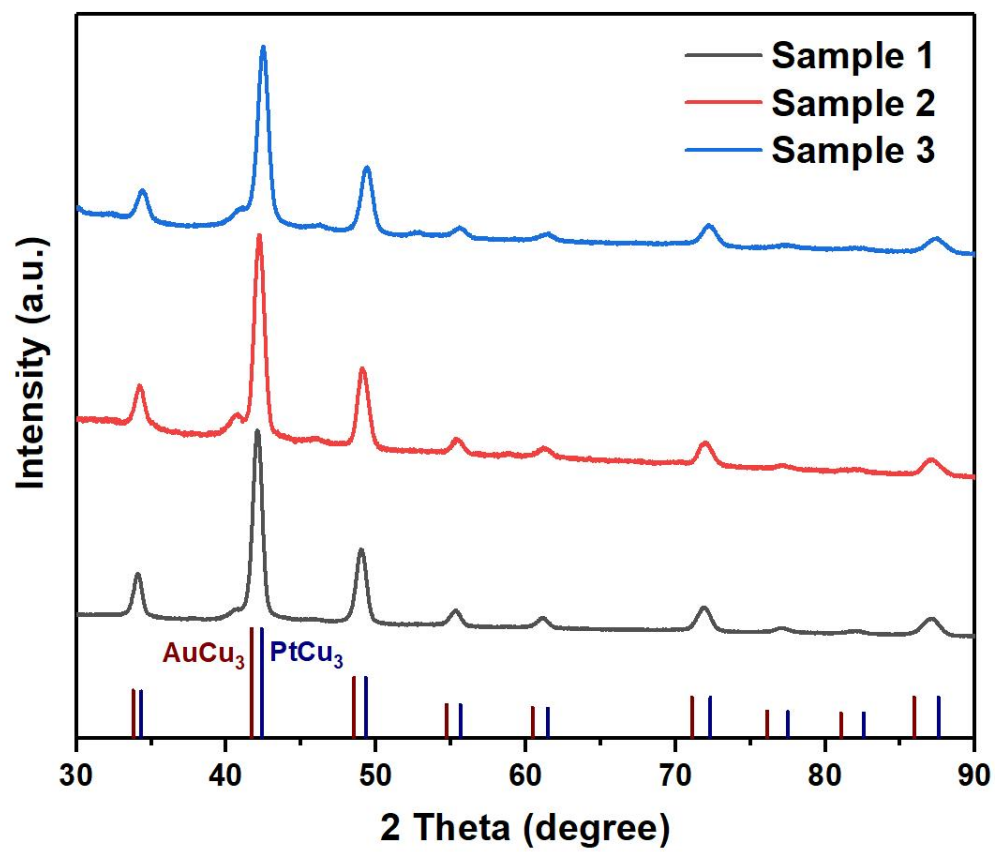

Fig. S16 XRD pattern of  $\text{Au}_{0.4}\text{Pt}_{0.6}\text{Cu}_3/\text{rGO}$  parallel samples.



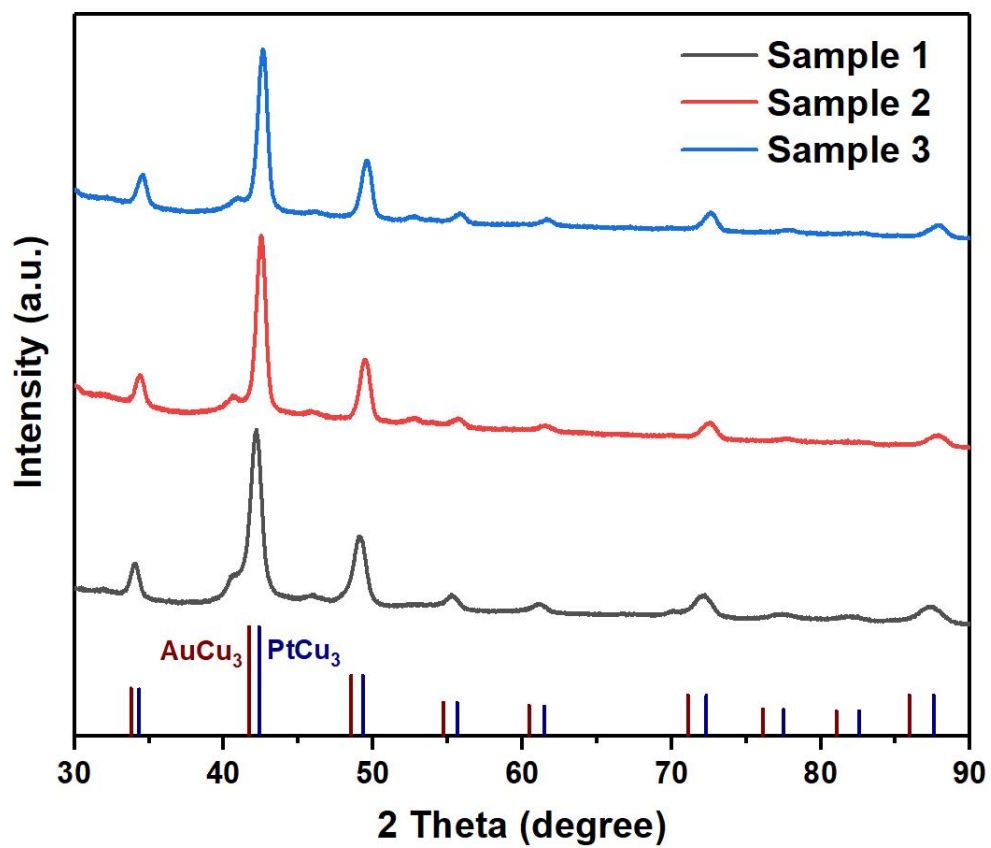

Fig. S17 XRD pattern of  $\text{Au}_{0.2}\text{Pt}_{0.8}\text{Cu}_3/\text{rGO}$  parallel samples.

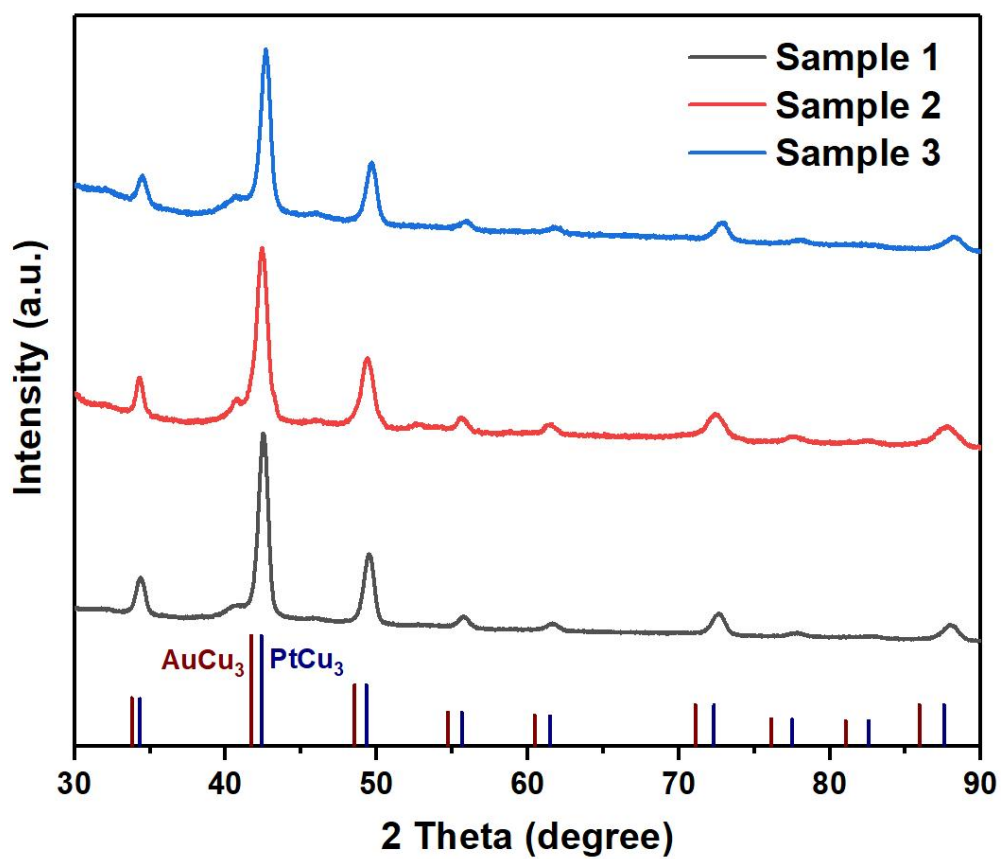

Fig. S18 XRD pattern of PtCu<sub>3</sub>/rGO parallel samples.

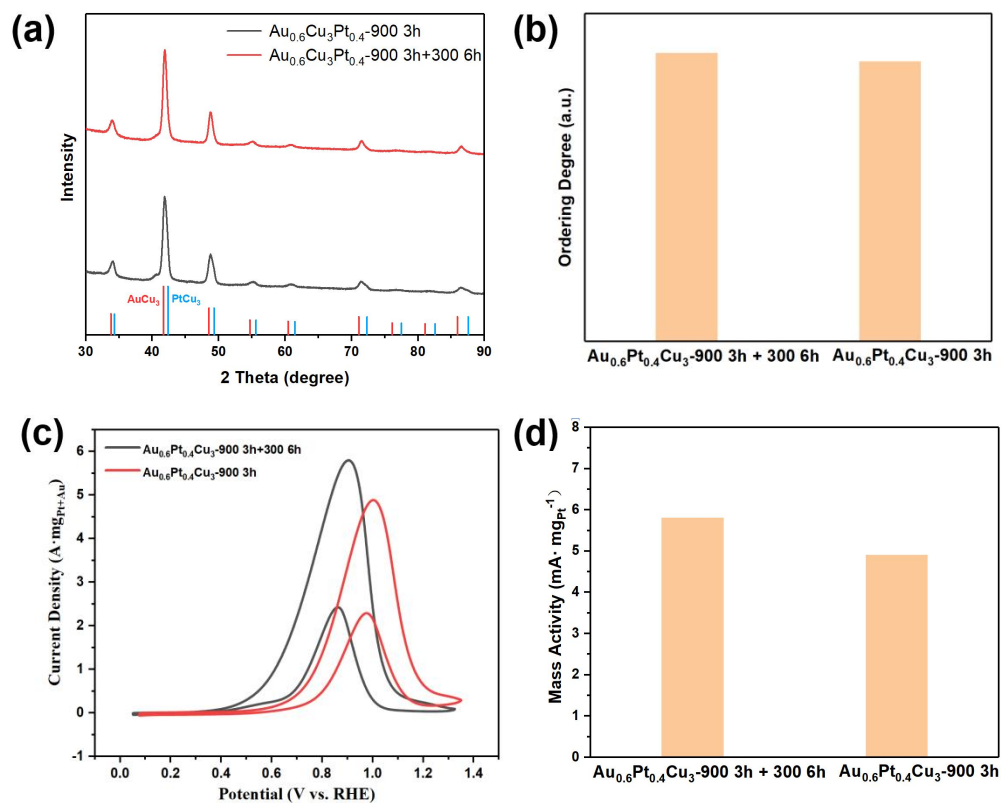

**Fig. S19** (a) XRD pattern of  $\text{Au}_{0.6}\text{Pt}_{0.4}\text{Cu}_3/\text{rGO}$  samples annealed at  $900^\circ\text{C}$  for 3h, annealed at  $900^\circ\text{C}$  for 3h and  $300^\circ\text{C}$  for 6h and (b) their ordering degree. (c) Ethanol oxidation performance of  $\text{Au}_{0.6}\text{Pt}_{0.4}\text{Cu}_3/\text{rGO}$  samples annealed at  $900^\circ\text{C}$  for 3h, annealed at  $900^\circ\text{C}$  for 3h and  $300^\circ\text{C}$  for 6h and (d) activity comparison.

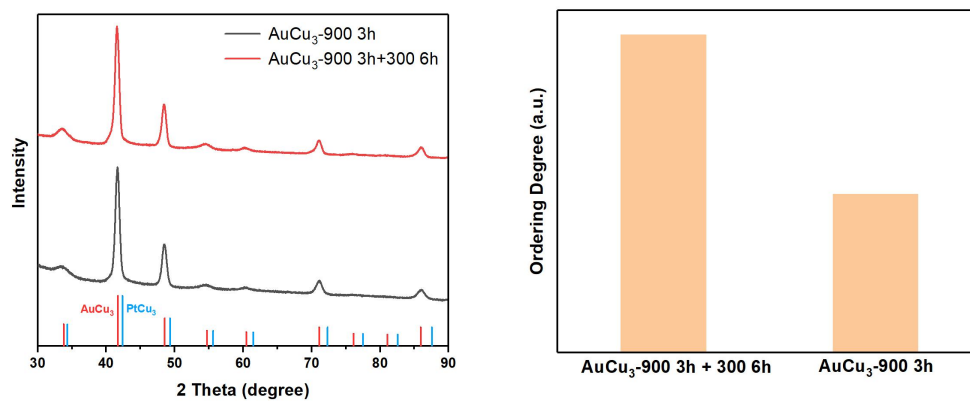

**Fig. S20** XRD pattern of AuCu<sub>3</sub>/rGO samples annealed at 900°C for 3h, annealed at 900°C for 3h and 300°C for 6h and their ordering degree.

**Table S1** ICP results of Au<sub>x</sub>Pt<sub>1-x</sub>Cu<sub>3</sub>/rGO samples with various values of x.

| Sample                                                   | Atomic Ratio |             |             |
|----------------------------------------------------------|--------------|-------------|-------------|
|                                                          | Au           | Cu          | Pt          |
| PtCu <sub>3</sub> /rGO                                   | 0            | 0.818607955 | 0.181392045 |
| Au <sub>0.2</sub> Cu <sub>3</sub> Pt <sub>0.8</sub> /rGO | 0.028962411  | 0.829645331 | 0.141392258 |
| Au <sub>0.4</sub> Cu <sub>3</sub> Pt <sub>0.6</sub> /rGO | 0.073480344  | 0.823508243 | 0.103011414 |
| Au <sub>0.6</sub> Cu <sub>3</sub> Pt <sub>0.4</sub> /rGO | 0.115593784  | 0.81551273  | 0.068893487 |
| Au <sub>0.8</sub> Cu <sub>3</sub> Pt <sub>0.2</sub> /rGO | 0.138738842  | 0.826128833 | 0.035132325 |
| AuCu <sub>3</sub> /rGO                                   | 0.217636877  | 0.782363123 | 0           |

**Table S2** Ratios of precursors in Au<sub>x</sub>Pt<sub>1-x</sub>Cu<sub>3</sub>/rGO samples with various values of x.

| Sample                                                   | HAuCl <sub>4</sub> ·4H <sub>2</sub> O (mmol) | CuCl <sub>2</sub> ·2H <sub>2</sub> O (mmol) | H <sub>2</sub> PtCl <sub>6</sub> ·6H <sub>2</sub> O (mmol) |
|----------------------------------------------------------|----------------------------------------------|---------------------------------------------|------------------------------------------------------------|
| PtCu <sub>3</sub> /rGO                                   | 0                                            | 0.075                                       | 0.025                                                      |
| Au <sub>0.2</sub> Cu <sub>3</sub> Pt <sub>0.8</sub> /rGO | 0.005                                        | 0.075                                       | 0.020                                                      |
| Au <sub>0.4</sub> Cu <sub>3</sub> Pt <sub>0.6</sub> /rGO | 0.010                                        | 0.075                                       | 0.015                                                      |
| Au <sub>0.6</sub> Cu <sub>3</sub> Pt <sub>0.4</sub> /rGO | 0.015                                        | 0.075                                       | 0.010                                                      |
| Au <sub>0.8</sub> Cu <sub>3</sub> Pt <sub>0.2</sub> /rGO | 0.020                                        | 0.075                                       | 0.005                                                      |
| AuCu <sub>3</sub> /rGO                                   | 0.025                                        | 0.075                                       | 0                                                          |



**Table S3** d-band center of Pt in the Pt<sub>18</sub>Cu<sub>54</sub>.

| Sites   | d-band center (eV) |
|---------|--------------------|
| Pt1:    | -1.9396            |
| Pt2:    | -1.9422            |
| Pt3:    | -1.9428            |
| Pt4:    | -1.9423            |
| Pt5:    | -1.9409            |
| Pt6:    | -1.9421            |
| Pt7:    | -1.9436            |
| Pt8:    | -1.941             |
| Pt9:    | -1.9411            |
| Pt10:   | -1.9395            |
| Pt11:   | -1.9425            |
| Pt12:   | -1.9427            |
| Pt13:   | -1.9421            |
| Pt14:   | -1.9409            |
| Pt15:   | -1.9421            |
| Pt16:   | -1.9433            |
| Pt17:   | -1.9411            |
| Pt18:   | -1.9403            |
| Average | -1.9417            |

**Table S4** d-band center of Pt in the Au<sub>6</sub>Pt<sub>12</sub>Cu<sub>54</sub>.

| Sites   | d-band center (eV) |
|---------|--------------------|
| Pt1:    | -1.9841            |
| Pt2:    | -2.0016            |
| Pt3:    | -2.003             |
| Pt4:    | -1.9831            |
| Pt5:    | -1.9941            |
| Pt6:    | -1.9945            |
| Pt7:    | -1.9814            |
| Pt8:    | -1.9871            |
| Pt9:    | -1.987             |
| Pt10:   | -1.9813            |
| Pt11:   | -1.977             |
| Pt12:   | -1.9776            |
| Average | -1.98765           |

**Table S5** d-band center of Pt in the Au<sub>12</sub>Pt<sub>6</sub>Cu<sub>54</sub>.

| Sites   | d-band center (eV) |
|---------|--------------------|
| Pt1:    | -2.1428            |
| Pt2:    | -2.1434            |
| Pt3:    | -2.1096            |
| Pt4:    | -2.1625            |
| Pt5:    | -2.1505            |
| Pt6:    | -2.1428            |
| Average | -2.1419            |

## Reference

- (1) F. P. Lohmann-Richters, B. Abel and Á. Varga, *J. Mater. Chem. A*, 2018, 6, 2700-2707.
- (2) M. Łukaszewski, M. Soszko and A. Czerwiński, *Int. J. Electrochem. Sci.*, 2016, 11, 4442-4469.
